# Supplementary material for: Efficacy and Safety of High-Dose Immunoglobulin-Based Regimen in Statin-Associated Autoimmune Myopathy: A Multi-Center and Multi-Disciplinary Retrospective Study
Source: MDPI journal article supplement (doi:10.3390/jcm9113454), 2020-10-27
Supplement: s1 [file s1]

**Table S1.** Characteristics of the relapsed patients (*n*=3).

| Pts.       | Age at relapse | Months of follow-up at relapse | Clinical Features at relapse                      | CK level at relapse | Anti-HMGCR antibody titer at relapse | Ongoing therapy                | Duration of drug-free period before relapse | Therapeutic changes                                                                                                        |
|------------|----------------|--------------------------------|---------------------------------------------------|---------------------|--------------------------------------|--------------------------------|---------------------------------------------|----------------------------------------------------------------------------------------------------------------------------|
| <b>P03</b> | 75             | 18                             | Upper and lower limbs weakness (MRC 3/5), myalgia | 2887 IU/L           | 420 UA/mL                            | None                           | 9 months                                    | Restarted monthly IVIG and MTX                                                                                             |
| <b>P05</b> | 83             | 36                             | Upper and lower limbs weakness (MRC 3/5), myalgia | 1485 IU/L           | NA                                   | None                           | 12 months                                   | Restarted steroid therapy (induction with 250 mg/day MP intravenously for 3 days). IVIG as maintenance therapy             |
| <b>P13</b> | 71             | 35                             | Upper and lower limbs weakness (MRC 2/5), myalgia | 11344 IU/L          | 133 UA/mL                            | Monthly IVIG, MTX 10 mg/weekly | -                                           | Started RTX monotherapy: RTX 1000 mg two weeks apart, then 1000 mg at third and sixth month, then 1000 mg every six months |

Legend: CK, creatine kinase; anti-HMGCR, anti-hydroxy-methylglutaryl coenzyme A reductase; IV, intravenous; IVIG, immunoglobulins, MP, methylprednisolone; MTX, methotrexate; Pts, patients; RTX, rituximab; NA, not available.
